# Supplementary material
Source: publisher site journal article supplement (https://www.dovepress.com/article/495472)
Supplement: Supplementary file 1 [file get_supplementary_file.php]

**Supplementary material**

**Table S1** The edge weights in the stress‒interpersonal relationship network

|  | **S1** | **S2** | **S3** | **R1** | **R2** | **R3** | **R4** |
| --- | --- | --- | --- | --- | --- | --- | --- |
| **S1** | - | 0.3328 | 0.3135 | 0.0998 | 0.1101 | 0.1910 | 0.0431 |
| **S2** | 0.3328 | - | 0.3795 | 0.0128 | 0.0250 | 0.0000 | 0.0000 |
| **S3** | 0.3135 | 0.3795 | - | 0.0000 | 0.0312 | 0.0000 | 0.0413 |
| **R1** | 0.0998 | 0.0128 | 0.0000 | - | 0.4238 | 0.1127 | 0.2320 |
| **R2** | 0.1101 | 0.0250 | 0.0312 | 0.4238 | - | 0.2515 | 0.2198 |
| **R3** | 0.1910 | 0.0000 | 0.0000 | 0.1127 | 0.2515 | - | 0.0751 |
| **R4** | 0.0431 | 0.0000 | 0.0413 | 0.2320 | 0.2198 | 0.0751 | - |


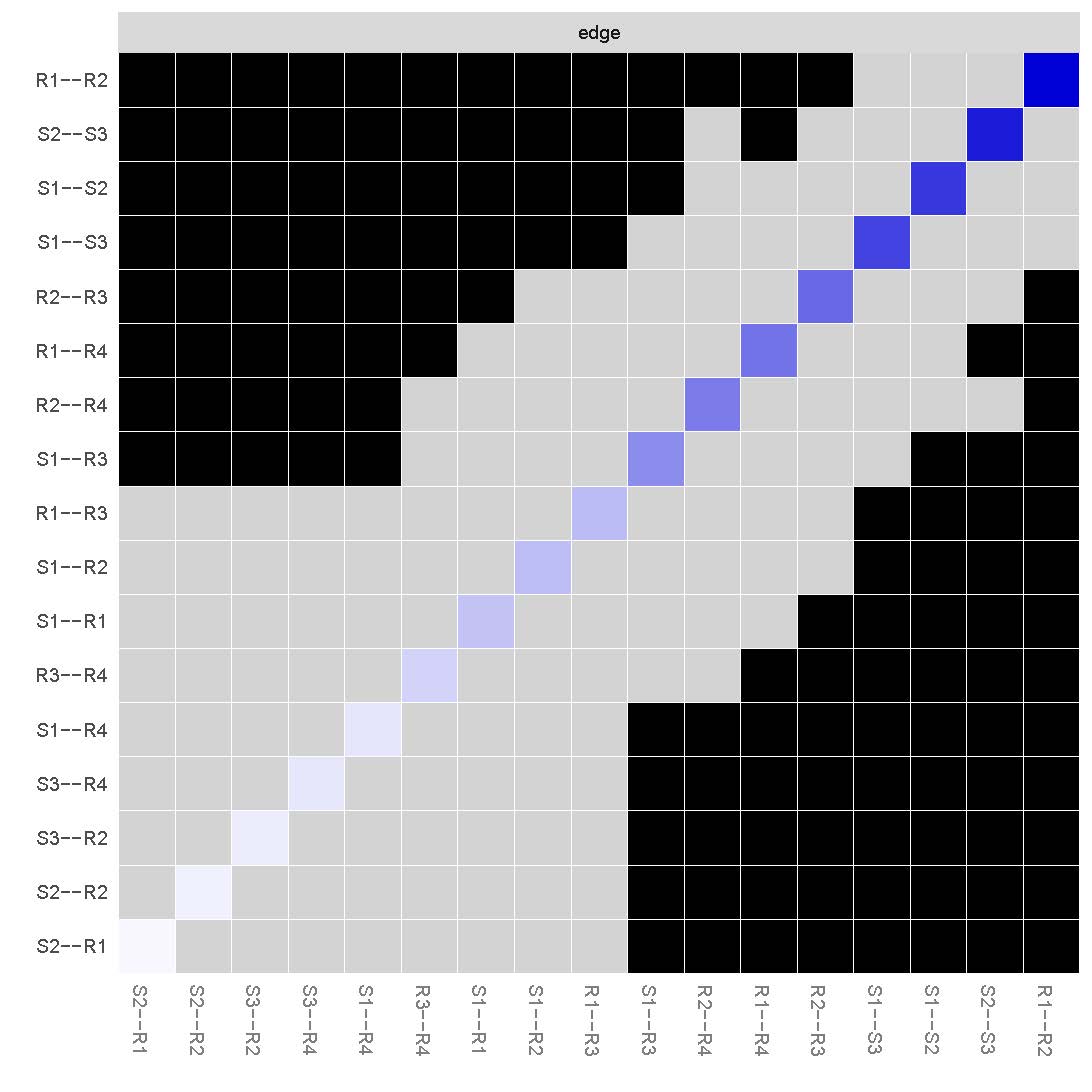


**Figure S1** Accuracy test of edge weights in the network.


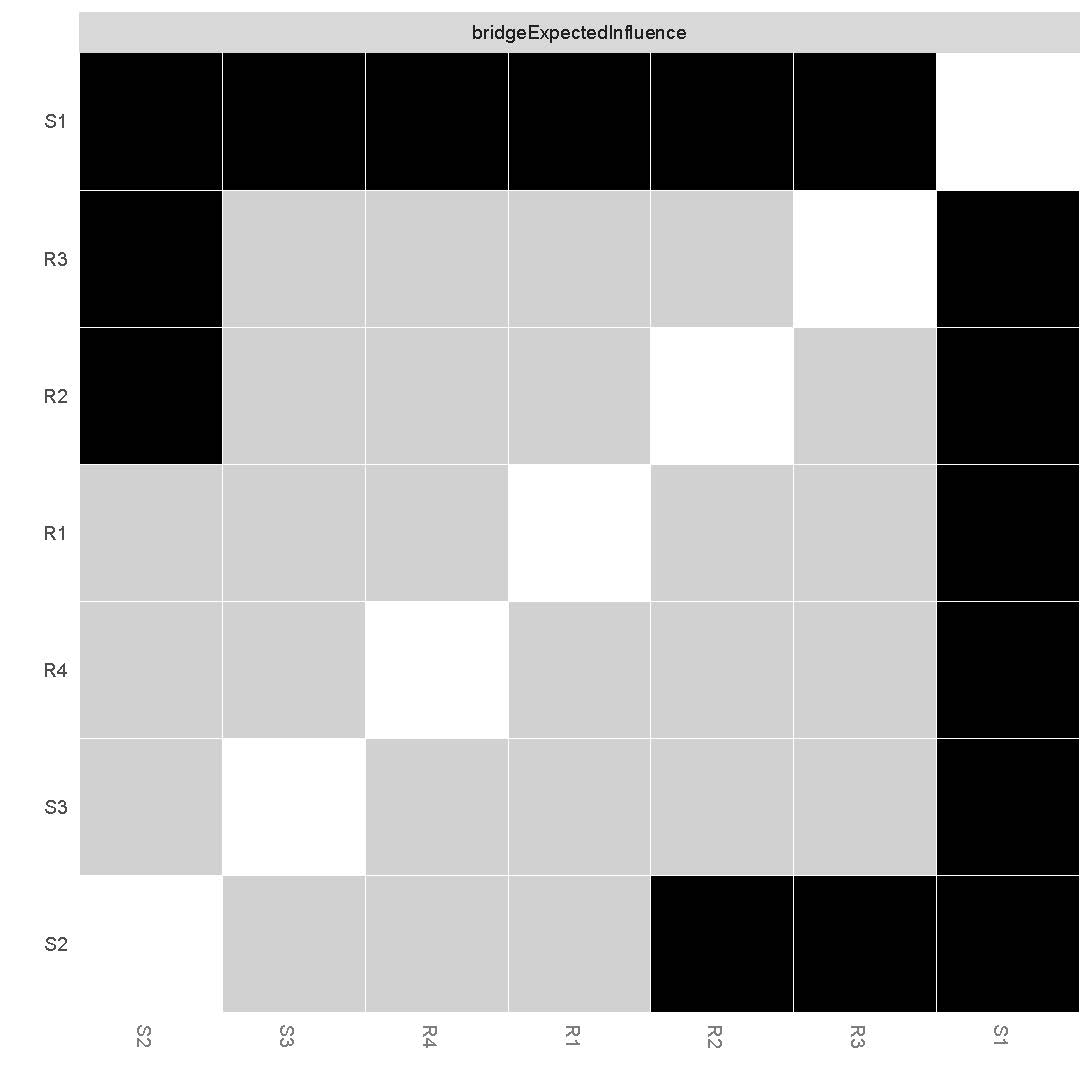


**Figure S2** The results of the difference test of node BEIs.
